# Supplementary material for: Cuproptosis-Related Gene DLAT as a Novel Biomarker Correlated with Prognosis, Chemoresistance, and Immune Infiltration in Pancreatic Adenocarcinoma: A Preliminary Study Based on Bioinformatics Analysis
Source: MDPI journal article supplement (doi:10.3390/curroncol30030228), 2023-03-02
Supplement: s1 [file s1]

## Supplementary materials

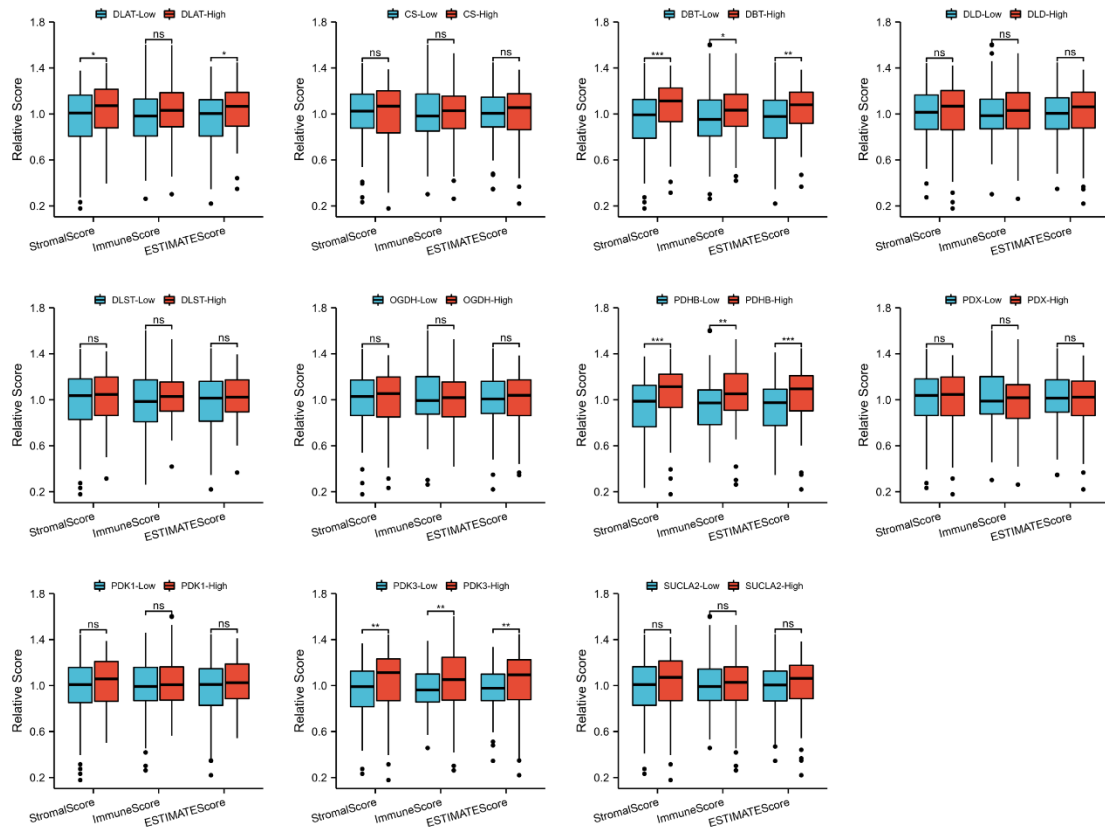

**Figure S1** The effect of *DLAT* and related key genes on the SS, IS and ES for PAAD samples (ns: no significance; \**p* value < 0.05; \*\**p* value < 0.01; \*\*\**p* value < 0.001).

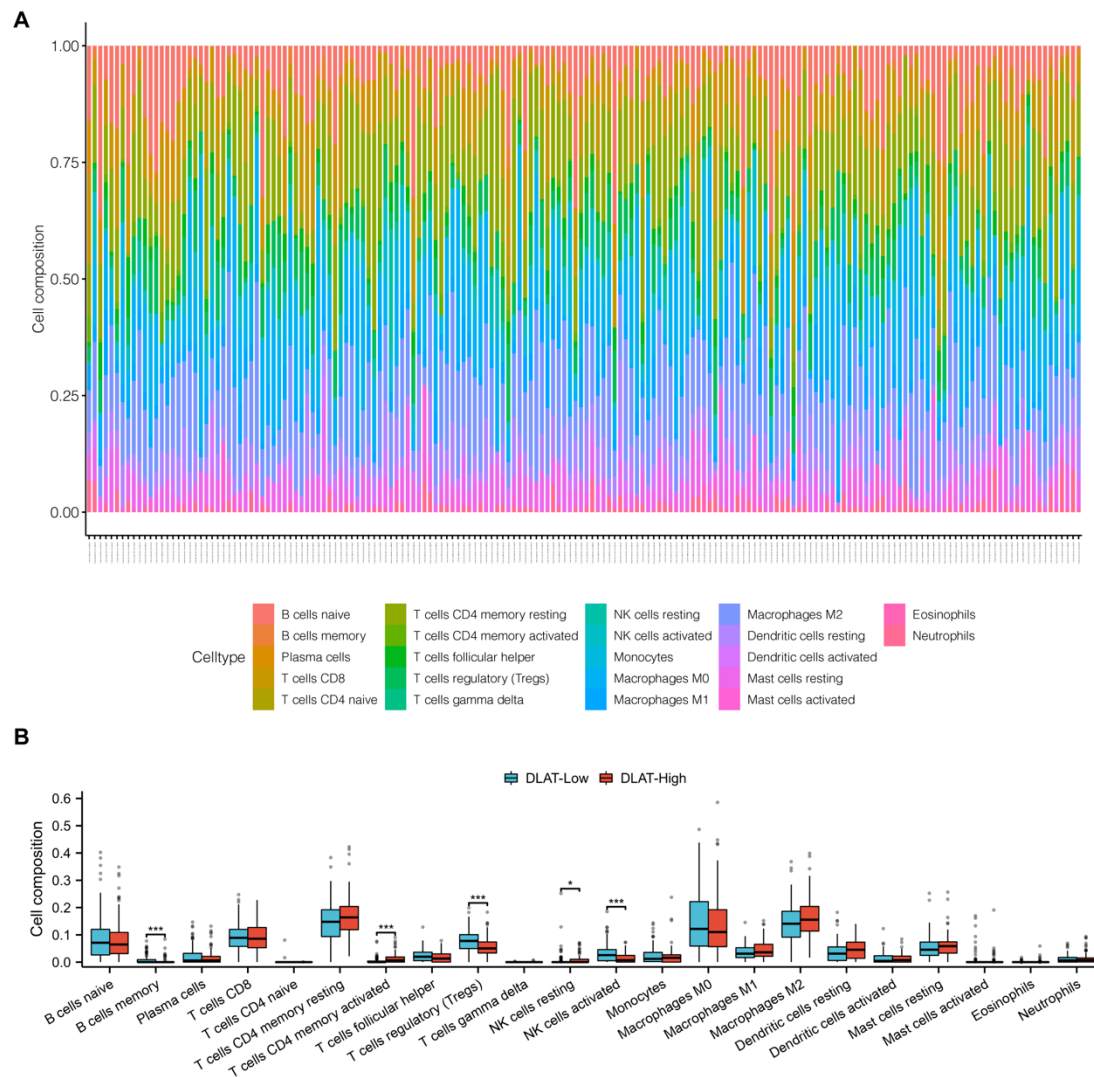

**Figure S2** Immune cell infiltration analysis based on CIBERSORT algorithm. (A) The convolution histogram shows the proportion of immune cells in different samples; (B) the difference in the immune cell abundance between *DLAT*-high and *DLAT*-low PAAD samples (\*p value < 0.05; \*\*p value < 0.01; \*\*\*p value < 0.001).

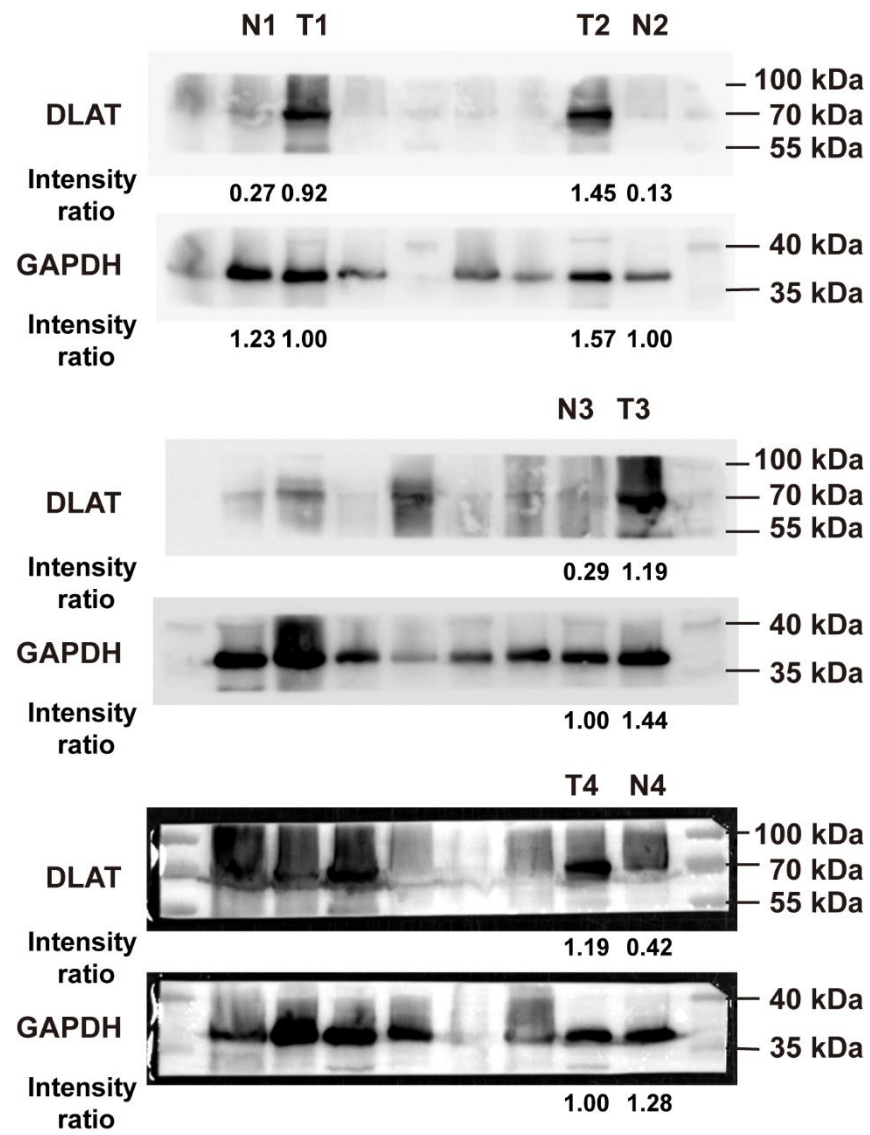

Figure S3. Western Blotting data

**Table S1** List of immunomodulatory genes obtained from the TISIDB database.

| Gene      | Protein | Description      |
|-----------|---------|------------------|
| ADORA2A   | A2aR    | Immunoinhibitor  |
| BTLA      | CD272   | Immunoinhibitor  |
| CD160     | CD160   | Immunoinhibitor  |
| CD244     | SLAMF4  | Immunoinhibitor  |
| CD274     | PD-L1   | Immunoinhibitor  |
| CD96      | CD96    | Immunoinhibitor  |
| CSF1R     | CSF1R   | Immunoinhibitor  |
| CTLA4     | CTLA-4  | Immunoinhibitor  |
| HAVCR2    | TIM3    | Immunoinhibitor  |
| IDO1      | IDO1    | Immunoinhibitor  |
| IL10      | IL10    | Immunoinhibitor  |
| IL10RB    | IL10RB  | Immunoinhibitor  |
| KDR       | VEGFR   | Immunoinhibitor  |
| KIR2DL1   | KIR2DL1 | Immunoinhibitor  |
| KIR2DL3   | KIR2DL3 | Immunoinhibitor  |
| LAG3      | LAG3    | Immunoinhibitor  |
| LGALS9    | LGALS9  | Immunoinhibitor  |
| PDCD1     | PD-1    | Immunoinhibitor  |
| PDCD1LG2  | PD-L2   | Immunoinhibitor  |
| PVRL2     | CD112   | Immunoinhibitor  |
| TGFB1     | TGFB1   | Immunoinhibitor  |
| TGFBR1    | TGFBR1  | Immunoinhibitor  |
| TIGIT     | TIGIT   | Immunoinhibitor  |
| VTCN1     | B7-H4   | Immunoinhibitor  |
| BTNL2     | BTNL2   | Immunostimulator |
| C10orf54  | VISTA   | Immunostimulator |
| CD27      | CD27    | Immunostimulator |
| CD276     | B7-H3   | Immunostimulator |
| CD28      | CD28    | Immunostimulator |
| CD40      | CD40    | Immunostimulator |
| CD40LG    | CD40LG  | Immunostimulator |
| CD48      | CD48    | Immunostimulator |
| CD70      | CD70    | Immunostimulator |
| CD80      | B7.1    | Immunostimulator |
| CD86      | B7.2    | Immunostimulator |
| CXCL12    | CXCL12  | Immunostimulator |
| CXCR4     | CXCR4   | Immunostimulator |
| ENTPD1    | CD39    | Immunostimulator |
| HHLA2     | B7-H7   | Immunostimulator |
| ICOS      | ICOS    | Immunostimulator |
| ICOSLG    | B7-H2   | Immunostimulator |
| IL2RA     | CD25    | Immunostimulator |
| IL6       | IL6     | Immunostimulator |
| IL6R      | IL6R    | Immunostimulator |
| KLRC1     | NKG2A   | Immunostimulator |
| KLRK1     | NKG2D   | Immunostimulator |
| LTA       | LTA     | Immunostimulator |
| MICB      | MICB    | Immunostimulator |
| NT5E      | CD73    | Immunostimulator |
| PVR       | CD155   | Immunostimulator |
| RAET1E    | RAET1E  | Immunostimulator |
| TMEM173   | STING   | Immunostimulator |
| TMIGD2    | TMIGD2  | Immunostimulator |
| TNFRSF13B | CD267   | Immunostimulator |
| TNFRSF13C | BAFF-R  | Immunostimulator |
| TNFRSF14  | HVEM    | Immunostimulator |

|          |         |                  |
|----------|---------|------------------|
| TNFRSF17 | BCMA    | Immunostimulator |
| TNFRSF18 | GITR    | Immunostimulator |
| TNFRSF25 | DR3     | Immunostimulator |
| TNFRSF4  | OX40    | Immunostimulator |
| TNFRSF8  | CD30    | Immunostimulator |
| TNFRSF9  | 4-1BB   | Immunostimulator |
| TNFSF13  | APRIL   | Immunostimulator |
| TNFSF13B | BAFF    | Immunostimulator |
| TNFSF14  | LIGHT   | Immunostimulator |
| TNFSF15  | TL1A    | Immunostimulator |
| TNFSF18  | GITRL   | Immunostimulator |
| TNFSF4   | OX-40L  | Immunostimulator |
| TNFSF9   | 4-1BB-L | Immunostimulator |
| ULBP1    | ULBP1   | Immunostimulator |

---

**Table S2** Results of GSEA according to the “h.all.v7.5.symbols.gmt” gene set.

| Description                                | enrichmentScore | NES        | p.adjust   |
|--------------------------------------------|-----------------|------------|------------|
| HALLMARK_ALLOGRAFT_REJECTION               | 0.5013659       | 2.35863664 | 0.00527872 |
| HALLMARK_KRAS_SIGNALING_UP                 | 0.42207929      | 1.98563901 | 0.00527872 |
| HALLMARK_IL2_STAT5_SIGNALING               | 0.31685522      | 1.49062061 | 0.00527872 |
| HALLMARK_EPITHELIAL_MESENCHYMAL_TRANSITION | 0.57519248      | 2.70854383 | 0.00527872 |
| HALLMARK_INFLAMMATORY_RESPONSE             | 0.54597787      | 2.56661821 | 0.00527872 |
| HALLMARK_G2M_CHECKPOINT                    | 0.46771582      | 2.19871171 | 0.00527872 |
| HALLMARK_INTERFERON_GAMMA_RESPONSE         | 0.43029524      | 2.02623217 | 0.00527872 |
| HALLMARK_MITOTIC_SPINDLE                   | 0.37611089      | 1.76808094 | 0.00527872 |
| HALLMARK_COMPLEMENT                        | 0.36892312      | 1.73723488 | 0.00527872 |
| HALLMARK_TNFA_SIGNALING_VIA_NFKB           | 0.36604056      | 1.72366111 | 0.00527872 |
| HALLMARK_E2F_TARGETS                       | 0.36450068      | 1.71640988 | 0.00527872 |
| HALLMARK_APICAL_JUNCTION                   | 0.32721236      | 1.53821107 | 0.00527872 |
| HALLMARK_MTORC1_SIGNALING                  | 0.313446        | 1.47349601 | 0.00527872 |
| HALLMARK_UV_RESPONSE_DN                    | 0.48446772      | 2.17806131 | 0.00527872 |
| HALLMARK_PROTEIN_SECRETION                 | 0.39041863      | 1.67295604 | 0.00527872 |
| HALLMARK_IL6_JAK_STAT3_SIGNALING           | 0.49021913      | 2.06828973 | 0.00527872 |
| HALLMARK_OXIDATIVE_PHOSPHORYLATION         | -0.3182138      | -1.5682477 | 0.00847601 |
| HALLMARK_ANDROGEN_RESPONSE                 | 0.39301266      | 1.70296723 | 0.01350621 |
| HALLMARK_DNA_REPAIR                        | -0.3233591      | -1.5387949 | 0.02837282 |
| HALLMARK_ANGIOGENESIS                      | 0.44300819      | 1.54835578 | 0.07220217 |
| HALLMARK_APOPTOSIS                         | 0.2956582       | 1.34362362 | 0.07643507 |
| HALLMARK_KRAS_SIGNALING_DN                 | 0.27466243      | 1.29118866 | 0.09007761 |
| HALLMARK_TGF_BETA_SIGNALING                | 0.37481495      | 1.43976282 | 0.09348291 |
| HALLMARK_SPERMATOGENESIS                   | 0.2963382       | 1.31022908 | 0.09348291 |
| HALLMARK_INTERFERON_ALPHA_RESPONSE         | 0.28376059      | 1.22161478 | 0.2134647  |
| HALLMARK_COAGULATION                       | -0.2498355      | -1.1650413 | 0.27771956 |

**Table S3** Results of GSEA according to the “c2.cp.kegg.v7.5.symbols.gmt” gene set.

| Description                                               | EnrichmentScore | NES        | p.adjust   |
|-----------------------------------------------------------|-----------------|------------|------------|
| KEGG PATHWAYS IN CANCER                                   | 0.36064159      | 1.78092983 | 0.03166559 |
| KEGG_NEUROACTIVE_LIGAND_RECEPTOR_INTERACTION              | 0.3607433       | 1.73117775 | 0.03166559 |
| KEGG_CYTOKINE_CYTOKINE_RECEPTOR_INTERACTION               | 0.52001746      | 2.47329168 | 0.03166559 |
| KEGG_REGULATION_OF_ACTIN_CYTOSKELETON                     | 0.37417044      | 1.75460317 | 0.03166559 |
| KEGG_JAK_STAT_SIGNALING_PATHWAY                           | 0.42375027      | 1.87728561 | 0.03166559 |
| KEGG_CALCIIUM_SIGNALING_PATHWAY                           | 0.34018146      | 1.55696811 | 0.03166559 |
| KEGG_FOCAL_ADHESION                                       | 0.42281874      | 1.96163683 | 0.03166559 |
| KEGG_CHEMOKINE_SIGNALING_PATHWAY                          | 0.4586855       | 2.10660463 | 0.03166559 |
| KEGG_CELL_ADHESION_MOLECULES_CAMS                         | 0.52200133      | 2.29439776 | 0.03166559 |
| KEGG_NATURAL_KILLER_CELL_MEDIATED_CYTOTOXICITY            | 0.40046709      | 1.72936801 | 0.03166559 |
| KEGG_SMALL_CELL_LUNG_CANCER                               | 0.47804896      | 1.96698177 | 0.03166559 |
| KEGG_ECM_RECEPTOR_INTERACTION                             | 0.58118667      | 2.38493276 | 0.03166559 |
| KEGG_T_CELL_RECEPTOR_SIGNALING_PATHWAY                    | 0.40729875      | 1.72851959 | 0.03166559 |
| KEGG_SYSTEMIC_LUPUS_ERYTHEMATOSUS                         | 0.44086483      | 1.883665   | 0.03166559 |
| KEGG_HEMATOPOIETIC_CELL_LINEAGE                           | 0.57546919      | 2.35590459 | 0.03166559 |
| KEGG_ADHERENS_JUNCTION                                    | 0.44666634      | 1.79019868 | 0.03166559 |
| KEGG_VIRAL_MYOCARDITIS                                    | 0.43680132      | 1.73082973 | 0.03166559 |
| KEGG_LEISHMANIA_INFECTION                                 | 0.54807368      | 2.17324032 | 0.03166559 |
| KEGG_ANTIGEN_PROCESSING_AND_PRESENTATION                  | 0.44736538      | 1.76767653 | 0.03166559 |
| KEGG_INTESTINAL_IMMUNE_NETWORK_FOR_IGA_PRODUCTION         | 0.63642265      | 2.32535782 | 0.03166559 |
| KEGG_TYPE_I_DIABETES_MELLITUS                             | 0.57607759      | 2.05755354 | 0.03166559 |
| KEGG_PRIMARY_IMMUNODEFICIENCY                             | 0.55509686      | 1.90882835 | 0.03166559 |
| KEGG_ALLOGRAFT_REJECTION                                  | 0.57359304      | 1.98948177 | 0.03166559 |
| KEGG_ASTHMA                                               | 0.5879972       | 1.8787335  | 0.03166559 |
| KEGG_GRAFT_VERSUS_HOST_DISEASE                            | 0.60988361      | 2.13039835 | 0.03166559 |
| KEGG_RIBOSOME                                             | -0.5392374      | -2.307014  | 0.03723555 |
| KEGG_PARKINSONS_DISEASE                                   | -0.4235233      | -1.8956174 | 0.03723555 |
| KEGG_OXIDATIVE_PHOSPHORYLATION                            | -0.4942051      | -2.2215101 | 0.03723555 |
| KEGG_HUNTINGTONS_DISEASE                                  | -0.3324662      | -1.5930316 | 0.03784286 |
| KEGG_AXON_GUIDANCE                                        | 0.37344459      | 1.64050805 | 0.04191213 |
| KEGG_ARRHYTHMOGENIC_RIGHT_VENTRICULAR_CARDIOMYOPATHY_ARVC | 0.44474556      | 1.78902637 | 0.04191213 |
| KEGG_NOD_LIKE_RECEPTOR_SIGNALING_PATHWAY                  | 0.4476943       | 1.74611576 | 0.04191213 |
| KEGG_CELL_CYCLE                                           | 0.35641065      | 1.56005346 | 0.05373718 |
| KEGG_LEUKOCYTE_TRANSENDOTHELIAL_MIGRATION                 | 0.38568719      | 1.64790974 | 0.05476678 |
| KEGG_AUTOIMMUNE_THYROID_DISEASE                           | 0.50738156      | 1.78419533 | 0.0550724  |
| KEGG_APOPTOSIS                                            | 0.41447295      | 1.70539173 | 0.06384647 |
| KEGG_HYPERTROPHIC_CARDIOMYOPATHY_HCM                      | 0.39645994      | 1.62689607 | 0.06384647 |
| KEGG_B_CELL_RECEPTOR_SIGNALING_PATHWAY                    | 0.41288708      | 1.66087294 | 0.07154866 |
| KEGG_TOLL_LIKE_RECEPTOR_SIGNALING_PATHWAY                 | 0.40792787      | 1.68994975 | 0.07154866 |
| KEGG_DILATED_CARDIOMYOPATHY                               | 0.40073203      | 1.66013906 | 0.07154866 |
| KEGG_O_GLYCAN_BIOSYNTHESIS                                | 0.51671279      | 1.68839978 | 0.07401048 |
| KEGG_PROSTATE_CANCER                                      | 0.3806964       | 1.57713612 | 0.07913119 |
| KEGG_MELANOMA                                             | 0.42157162      | 1.67048189 | 0.07981617 |
| KEGG_PANCREATIC_CANCER                                    | 0.40061382      | 1.59507942 | 0.0854382  |
| KEGG_OOCYTE_MEIOSIS                                       | 0.34265473      | 1.45806988 | 0.10767099 |
| KEGG_GLYCINE_SERINE_AND_THREONINE_METABOLISM              | -0.4695024      | -1.6250524 | 0.1143012  |
| KEGG_PROGESTERONE_MEDIATED_OOCYTE_MATURATION              | 0.36964425      | 1.51685633 | 0.1351811  |
| KEGG_FC_GAMMA_R_MEDIATED_PHAGOCYTOSIS                     | 0.35382878      | 1.47320335 | 0.14052354 |
| KEGG_VASCULAR_SMOOTH_MUSCLE_CONTRACTION                   | 0.3341269       | 1.42761023 | 0.14052354 |
| KEGG_LONG_TERM_DEPRESSION                                 | 0.370469        | 1.4689962  | 0.14783    |
| KEGG_TGF_BETA_SIGNALING_PATHWAY                           | 0.36131908      | 1.48917345 | 0.15564561 |
| KEGG_PROXIMAL_TUBULE_BICARBONATE_RECLAMATION              | -0.4883714      | -1.540467  | 0.16461307 |
| KEGG_COLORECTAL_CANCER                                    | 0.37987228      | 1.48159353 | 0.16665924 |

|                                               |            |            |            |
|-----------------------------------------------|------------|------------|------------|
| KEGG_MAPK_SIGNALING_PATHWAY                   | 0.26443739 | 1.27225698 | 0.18753899 |
| KEGG_ENDOMETRIAL_CANCER                       | 0.38281489 | 1.44963182 | 0.20968633 |
| KEGG_FC_EPSILON_RI_SIGNALING_PATHWAY          | 0.34479496 | 1.3916741  | 0.21034821 |
| KEGG_GAP_JUNCTION                             | 0.33237138 | 1.3711064  | 0.21523601 |
| KEGG_RENAL_CELL_CARCINOMA                     | 0.346182   | 1.37835432 | 0.21523601 |
| KEGG_NON_SMALL_CELL_LUNG_CANCER               | 0.37294504 | 1.41984613 | 0.21780918 |
| KEGG_STARCH_AND_SUCROSE_METABOLISM            | 0.37674891 | 1.39833548 | 0.22953931 |
| KEGG_GLIOMA                                   | 0.34773844 | 1.37447884 | 0.2323431  |
| KEGG_RENIN_ANGIOTENSIN_SYSTEM                 | 0.50791321 | 1.45350425 | 0.25022365 |
| KEGG_ALZHEIMERS_DISEASE                       | -0.2603412 | -1.2329537 | 0.26422759 |
| KEGG_COMPLEMENT_AND_COAGULATION_CASCADES      | -0.3270652 | -1.3383664 | 0.26616503 |
| KEGG_ETHER_LIPID_METABOLISM                   | 0.40361484 | 1.36170339 | 0.27776662 |
| KEGG_WNT_SIGNALING_PATHWAY                    | 0.27634468 | 1.23763491 | 0.28637824 |
| KEGG_CHRONIC_MYELOID_LEUKEMIA                 | 0.32282178 | 1.29384075 | 0.29115217 |
| KEGG_TYROSINE_METABOLISM                      | -0.3534909 | -1.3086019 | 0.29678693 |
| KEGG_PENTOSE_AND_GLUCURONATE_INTERCONVERSIONS | 0.42931473 | 1.37172075 | 0.29678693 |
| KEGG_STEROID_HORMONE_BIOSYNTHESIS             | 0.35647224 | 1.34987827 | 0.29678693 |
| KEGG_NEUROTROPHIN_SIGNALING_PATHWAY           | 0.28687733 | 1.25703454 | 0.29678693 |

---



**Table S4** Correlation between DLAT and the IC50 values of multiple drugs calculated based on the data from the GDSC database.

| Drug               | Correlation | p value    |
|--------------------|-------------|------------|
| ERK Inhibitor      | 0.4906716   | 5.69E-10   |
| Dactinomycin       | 0.45385104  | 1.41E-08   |
| AZD2014            | 0.44097483  | 3.96E-08   |
| Palbociclib        | 0.39868297  | 8.92E-07   |
| VSP34              | 0.39656159  | 1.03E-06   |
| Pictilisib         | 0.38536023  | 2.18E-06   |
| Irinotecan         | 0.38191403  | 2.73E-06   |
| Elephantin         | 0.36541508  | 7.76E-06   |
| Topotecan          | 0.35558278  | 1.41E-05   |
| Dactolisib         | 0.35059937  | 1.89E-05   |
| Camptothecin       | 0.34087712  | 3.31E-05   |
| Mirin              | 0.3407109   | 3.34E-05   |
| VX-11e             | 0.33568514  | 4.43E-05   |
| Oxaliplatin        | 0.33426335  | 4.79E-05   |
| GNE-317            | 0.33232304  | 5.33E-05   |
| Dabrafenib         | 0.33209804  | 5.40E-05   |
| Gemcitabine        | 0.33013004  | 6.01E-05   |
| Teniposide         | 0.31159696  | 0.0001602  |
| Uprosertib         | 0.30967093  | 0.00017673 |
| AZD5153            | 0.30822632  | 0.00019015 |
| Epirubicin         | 0.29834477  | 0.00031065 |
| 5-Fluorouracil     | 0.29457778  | 0.00037288 |
| OSI-027            | 0.28781015  | 0.00051443 |
| PF-4708671         | 0.28442486  | 0.00060249 |
| Cytarabine         | 0.27662752  | 0.00086058 |
| Mitoxantrone       | 0.26372003  | 0.0015184  |
| Nutlin-3a (-)      | 0.25742006  | 0.00198349 |
| Sabutoclax         | 0.25694215  | 0.00202357 |
| Vinorelbine        | 0.25690328  | 0.00202686 |
| Leflunomide        | 0.25474286  | 0.00221767 |
| Eg5                | 0.25459971  | 0.00223087 |
| Rapamycin          | 0.24558245  | 0.00322082 |
| ULK1 Inhibitor     | 0.24557837  | 0.00322134 |
| Pevonedistat       | 0.24211937  | 0.003696   |
| Cisplatin          | 0.23349376  | 0.00516481 |
| Fulvestrant        | 0.23304717  | 0.00525342 |
| PRIMA-1MET         | 0.23295226  | 0.00527242 |
| Foretinib          | 0.23097635  | 0.0056823  |
| PD0325901          | 0.22984704  | 0.00592912 |
| SB505124           | 0.22917314  | 0.00608092 |
| Lapatinib          | 0.22308678  | 0.00761665 |
| Niraparib          | 0.22128695  | 0.00813236 |
| Vorinostat         | 0.20790826  | 0.01303514 |
| Afuresertib        | 0.20275601  | 0.01552254 |
| Obatoclax Mesylate | 0.20055537  | 0.016705   |
| OTX015             | 0.19572824  | 0.01957574 |
| Talazoparib        | 0.19522327  | 0.01989934 |
| Selumetinib        | 0.18750176  | 0.02545356 |
| Buparlisib         | 0.18579854  | 0.02684331 |
| Dihydrorotenone    | 0.18416353  | 0.02823786 |
| Docetaxel          | 0.18146988  | 0.03066998 |
| GSK269962A         | 0.18021332  | 0.03186407 |
| JAK1 Inhibitor     | 0.17880905  | 0.03324494 |
| Wnt-C59            | 0.1759958   | 0.0361641  |
| Sorafenib          | 0.17506761  | 0.03717347 |
| MK-2206            | 0.1750612   | 0.03718052 |

|                          |            |            |
|--------------------------|------------|------------|
| Trametinib               | 0.17065605 | 0.04230089 |
| WZ4003                   | 0.15113649 | 0.0725886  |
| AZD8055                  | 0.15087061 | 0.07309877 |
| AZD1332                  | 0.14933623 | 0.07609986 |
| AT13148                  | 0.14744171 | 0.07994169 |
| LGK974                   | 0.13756081 | 0.10257247 |
| SCH772984                | 0.13058238 | 0.12139249 |
| XAV939                   | 0.13034655 | 0.1220723  |
| Pyridostatin             | 0.12317036 | 0.14419722 |
| PRT062607                | 0.12058107 | 0.15288638 |
| AZD5438                  | 0.12032376 | 0.15377094 |
| CDK9 Inhibitor           | 0.11561371 | 0.17064994 |
| AZD7762                  | 0.11510115 | 0.17256651 |
| Ulixertinib              | 0.11471887 | 0.17400627 |
| Ipatasertib              | 0.11380228 | 0.17749448 |
| Podophyllotoxin bromide  | 0.11352089 | 0.17857565 |
| IGF1R Inhibitor          | 0.1125811  | 0.18222153 |
| Axitinib                 | 0.11174047 | 0.18552879 |
| VE-822                   | 0.10968352 | 0.19380607 |
| Tamoxifen                | 0.10778675 | 0.20167357 |
| PLX-4720                 | 0.10382571 | 0.21884062 |
| Alisertib                | 0.10203641 | 0.22692664 |
| Entinostat               | 0.10168281 | 0.22854921 |
| GSK2578215A              | 0.0975302  | 0.2482177  |
| IRAK4                    | 0.09635965 | 0.25396754 |
| KRAS (G12C) Inhibitor-12 | 0.09568768 | 0.2573094  |
| Sapitinib                | 0.09558156 | 0.25783994 |
| AZD5363                  | 0.09239621 | 0.27411399 |
| Telomerase Inhibitor IX  | 0.09140267 | 0.27932902 |
| Olaparib                 | 0.091192   | 0.28044331 |
| AZD6738                  | 0.09049998 | 0.28412472 |
| AZ6102                   | 0.09017872 | 0.2858447  |
| GDC0810                  | 0.08950062 | 0.28949789 |
| Temozolomide             | 0.08773998 | 0.29912798 |
| MIRA-1                   | 0.08769688 | 0.29936635 |
| GSK1904529A              | 0.07918688 | 0.34888602 |
| PAK                      | 0.07792226 | 0.35666096 |
| TAF1                     | 0.07581206 | 0.36987292 |
| I-BET-762                | 0.07302129 | 0.38780117 |
| ML323                    | 0.07151339 | 0.39770241 |
| AZD4547                  | 0.06921739 | 0.41306466 |
| MK-8776                  | 0.06780906 | 0.42265729 |
| Taselisib                | 0.06292176 | 0.45693113 |
| AZD5582                  | 0.06095003 | 0.4711839  |
| Vinblastine              | 0.05865144 | 0.48810105 |
| Luminespib               | 0.05557882 | 0.51121163 |
| Ribociclib               | 0.05339633 | 0.52796387 |
| Nilotinib                | 0.0529537  | 0.53139486 |
| Vincristine              | 0.05116291 | 0.54538902 |
| Alpelisib                | 0.0506443  | 0.54947524 |
| EPZ5676                  | 0.03583732 | 0.67199439 |
| AGI-6780                 | 0.03581469 | 0.67218955 |
| P22077                   | 0.0341756  | 0.68638355 |
| Entospletinib            | 0.0334029  | 0.69311342 |
| GSK591                   | 0.03307862 | 0.69594495 |
| I-BRD9                   | 0.03227173 | 0.70300862 |
| AGI-5198                 | 0.03161823 | 0.70874812 |
| Afatinib                 | 0.0314582  | 0.71015613 |
| VE821                    | 0.03075177 | 0.71638327 |
| Sinularin                | 0.03015599 | 0.72164967 |
| YK-4-279                 | 0.02930688 | 0.7291778  |
| EPZ004777                | 0.02567457 | 0.76166608 |

|                      |            |            |
|----------------------|------------|------------|
| LJI308               | 0.02295098 | 0.78630574 |
| IAP                  | 0.02219292 | 0.79320271 |
| Paclitaxel           | 0.02145346 | 0.79994595 |
| PCI-34051            | 0.01834336 | 0.82846355 |
| Venetoclax           | 0.01633334 | 0.84701636 |
| BDP-00009066         | 0.01240186 | 0.8835388  |
| JAK Inhibitor        | 0.01189309 | 0.88828486 |
| BIBR-1532            | 0.01060407 | 0.90032667 |
| MIM1                 | 0.00894588 | 0.91585026 |
| Savolitinib          | 0.00866344 | 0.91849774 |
| Linsitinib           | 0.00735402 | 0.93078289 |
| Crizotinib           | -0.0011554 | 0.98911246 |
| OF-1                 | -0.0018996 | 0.98210033 |
| Gefitinib            | -0.0086052 | 0.9190433  |
| BMS-345541           | -0.0096896 | 0.90888341 |
| MK-1775              | -0.0112557 | 0.89423629 |
| Ibrutinib            | -0.0156683 | 0.85317399 |
| AZ960                | -0.017129  | 0.83966176 |
| LCL161               | -0.019345  | 0.81925256 |
| NVP-ADW742           | -0.0197354 | 0.8156695  |
| Navitoclax           | -0.0233889 | 0.78232865 |
| Acetalax             | -0.0244668 | 0.77256507 |
| Sepantronium bromide | -0.0262691 | 0.75631787 |
| AMG-319              | -0.0285215 | 0.73616392 |
| GSK2606414           | -0.0291803 | 0.73030261 |
| GSK343               | -0.0297883 | 0.72490653 |
| Cyclophosphamide     | -0.0340703 | 0.68729938 |
| Fludarabine          | -0.0351214 | 0.67817951 |
| Picolinici-acid      | -0.0364513 | 0.66670778 |
| BPD-00008900         | -0.048013  | 0.57043465 |
| IWP-2                | -0.0480312 | 0.57028843 |
| CZC24832             | -0.0486573 | 0.56526757 |
| Erlotinib            | -0.050093  | 0.55383511 |
| BMS-754807           | -0.0534078 | 0.52787509 |
| WIKI4                | -0.0587279 | 0.48753304 |
| Daporinad            | -0.0614572 | 0.46749466 |
| Dinaciclib           | -0.0651056 | 0.44142865 |
| AZD6482              | -0.0652314 | 0.44054517 |
| AZD8186              | -0.0703451 | 0.40547658 |
| Wee1 Inhibitor       | -0.0709598 | 0.40137521 |
| AZD1208              | -0.0730836 | 0.38739505 |
| Dasatinib            | -0.0786043 | 0.35245457 |
| MG-132               | -0.0837635 | 0.32164734 |
| Doramapimod          | -0.0854517 | 0.31195665 |
| PD173074             | -0.0903256 | 0.28505767 |
| Gallibiscoquinazole  | -0.0928262 | 0.27187771 |
| Zoledronate          | -0.109892  | 0.19295499 |
| PFI3                 | -0.1105567 | 0.19026038 |
| RVX-208              | -0.1123103 | 0.18328201 |
| Staurosporine        | -0.1222459 | 0.14725559 |
| Tozasertib           | -0.1284787 | 0.12756105 |
| JQ1                  | -0.13581   | 0.10706338 |
| Carmustine           | -0.1445799 | 0.08603912 |
| MN-64                | -0.1483961 | 0.07798725 |
| ABT737               | -0.1523896 | 0.07022292 |
| Nelarabine           | -0.1654628 | 0.04908234 |
| Ruxolitinib          | -0.1691862 | 0.04413562 |
| AZD5991              | -0.1752587 | 0.03696378 |
| SB216763             | -0.1762146 | 0.03592959 |
| LY2109761            | -0.1765326 | 0.0355591  |
| BMS-536924           | -0.179992  | 0.03207838 |
| WEHI-539             | -0.1920926 | 0.02201048 |

|             |            |            |
|-------------|------------|------------|
| NU7441      | -0.2017179 | 0.01607095 |
| KU-55933    | -0.2106485 | 0.01186008 |
| ZM447439    | -0.2222386 | 0.00785594 |
| Bortezomib  | -0.236488  | 0.00460444 |
| AZD3759     | -0.2371116 | 0.00449483 |
| BI-2536     | -0.2666588 | 0.0013375  |
| RO-3306     | -0.2782542 | 0.00079957 |
| Osimertinib | -0.2869597 | 0.00053536 |
| Cediranib   | -0.2889436 | 0.00048771 |
| UMI-77      | -0.4161903 | 2.59E-07   |

---

**Table S5** Correlation between DLAT and the IC50 values of multiple drugs calculated based on the data from the CTRP.

| Drug                                     | Correlation | p value    |
|------------------------------------------|-------------|------------|
| BRD-K79669418                            | 0.5600572   | 4.28E-13   |
| brivanib                                 | 0.53757782  | 5.27E-12   |
| BRD-K16130065                            | 0.52810897  | 1.44E-11   |
| BRD-A02303741:carboplatin (1:1 mol/mol)  | 0.4742904   | 2.48E-09   |
| BRD-K58730230                            | 0.47030837  | 3.51E-09   |
| SJ-172550                                | 0.4532902   | 1.47E-08   |
| linifanib                                | 0.44312575  | 3.34E-08   |
| BRD-K64610608                            | 0.43552462  | 6.06E-08   |
| CAY10576                                 | 0.43373633  | 6.96E-08   |
| erismodegib                              | 0.41888321  | 2.12E-07   |
| selumetinib:piperlongumine (8:1 mol/mol) | 0.40938436  | 4.22E-07   |
| STF-31                                   | 0.40666908  | 5.11E-07   |
| KH-CB19                                  | 0.39687563  | 1.01E-06   |
| pyrazolanthrone                          | 0.39317968  | 1.30E-06   |
| ouabain                                  | 0.38871933  | 1.75E-06   |
| linsitinib                               | 0.38595687  | 2.10E-06   |
| azacitidine                              | 0.38168661  | 2.78E-06   |
| sorafenib                                | 0.37045226  | 5.68E-06   |
| etomoxir                                 | 0.35311768  | 1.63E-05   |
| FQI-1                                    | 0.34306768  | 2.92E-05   |
| pitstop2                                 | 0.34247828  | 3.02E-05   |
| pevonedistat                             | 0.33367099  | 4.95E-05   |
| dapori0d                                 | 0.32581849  | 7.60E-05   |
| RITA                                     | 0.32294054  | 8.86E-05   |
| MLN2238                                  | 0.32108215  | 9.78E-05   |
| BMS-345541                               | 0.31828513  | 0.00011331 |
| skepinone-L                              | 0.31054684  | 0.00016902 |
| spautin-1                                | 0.30955958  | 0.00017773 |
| betulinic acid                           | 0.30816449  | 0.00019075 |
| CAY10618                                 | 0.30684535  | 0.00020387 |
| methotrexate                             | 0.30194752  | 0.00026027 |
| NSC19630                                 | 0.2858541   | 0.00056375 |
| MI-2                                     | 0.26608159  | 0.0013714  |
| hyperforin                               | 0.26541972  | 0.00141123 |
| VER-155008                               | 0.26252634  | 0.00159805 |
| GMX-1778                                 | 0.26246581  | 0.00160219 |
| fluorouracil                             | 0.25968958  | 0.00180281 |
| procarbazine                             | 0.25918264  | 0.00184182 |
| bexarotene                               | 0.25502411  | 0.00219194 |
| AZD7545                                  | 0.2543869   | 0.00225063 |
| necrosulfo0mide                          | 0.25380433  | 0.00230552 |
| bendamustine                             | 0.25155401  | 0.00252915 |
| Platin                                   | 0.24899174  | 0.00280754 |
| PHA-793887                               | 0.24182669  | 0.00373891 |
| TW-37                                    | 0.24131068  | 0.00381567 |
| ML029                                    | 0.23768053  | 0.00439687 |
| CIL70                                    | 0.23742417  | 0.00444077 |
| BRD-K97651142                            | 0.23204065  | 0.00545812 |
| gemcitabine                              | 0.23158829  | 0.00555242 |
| CR-1-31B                                 | 0.23013662  | 0.00586494 |
| tanespimycin                             | 0.22895161  | 0.00613157 |
| AGK-2                                    | 0.22654675  | 0.0067061  |
| BRD-K99584050                            | 0.22060307  | 0.00833627 |
| myricetin                                | 0.22045285  | 0.00838166 |
| HBX-41108                                | 0.21521083  | 0.010109   |
| EX-527                                   | 0.21082434  | 0.01178795 |

|                                        |            |            |
|----------------------------------------|------------|------------|
| ML203                                  | 0.21032853 | 0.01199232 |
| BRD-K13185470                          | 0.20930658 | 0.01242337 |
| BRD-K29086754                          | 0.2075499  | 0.01319611 |
| bosutinib                              | 0.20655789 | 0.01365079 |
| PF-3758309                             | 0.20404396 | 0.01486485 |
| I-BET151                               | 0.2019371  | 0.01595376 |
| AZ-3146                                | 0.20186995 | 0.01598958 |
| BRD-K70511574                          | 0.20115368 | 0.01637601 |
| Orciclasine                            | 0.20069436 | 0.01662807 |
| CI-976                                 | 0.19523391 | 0.01989247 |
| VAF-347                                | 0.19236067 | 0.02182247 |
| NVP-231                                | 0.19222135 | 0.02192002 |
| BRD9876                                | 0.19203502 | 0.02205106 |
| tivozanib                              | 0.19114593 | 0.02268569 |
| parbendazole                           | 0.19037527 | 0.02324842 |
| 0vitoclax:gemcitabine (1:1 mol/mol)    | 0.1885341  | 0.02464156 |
| marinopyrrole A                        | 0.18827548 | 0.02484287 |
| pazopanib                              | 0.18488686 | 0.02761347 |
| clofarabine                            | 0.18298741 | 0.02927879 |
| necrostatin-7                          | 0.1754397  | 0.03676603 |
| BRD-K07442505                          | 0.17174646 | 0.04098146 |
| BMS-536924                             | 0.17054509 | 0.04243713 |
| niclosamide                            | 0.1698257  | 0.04332934 |
| imatinib                               | 0.16923782 | 0.04407002 |
| RO4929097                              | 0.16796122 | 0.04571492 |
| cytarabine hydrochloride               | 0.1659456  | 0.04841603 |
| tanespimycin:gemcitabine (1:1 mol/mol) | 0.16448969 | 0.05044847 |
| 3-Cl-AHPC                              | 0.16361069 | 0.05170944 |
| BRD-K71935468                          | 0.16108775 | 0.05547435 |
| SNX-2112:bortezomib (250:1 mol/mol)    | 0.15896954 | 0.05880721 |
| FQI-2                                  | 0.15884817 | 0.05900306 |
| BRD-K88742110                          | 0.15551334 | 0.06459716 |
| docetaxel:tanespimycin (2:1 mol/mol)   | 0.14956539 | 0.07564543 |
| ISOX:bortezomib (250:1 mol/mol)        | 0.14935196 | 0.07606861 |
| bortezomib                             | 0.14933672 | 0.07609888 |
| GDC-0879                               | 0.14867441 | 0.07742464 |
| topotecan                              | 0.14849393 | 0.07778912 |
| decitabine                             | 0.14659393 | 0.08171064 |
| OSI-930                                | 0.14599316 | 0.08298308 |
| Merck60                                | 0.14488658 | 0.0853684  |
| BRD9876:MK-1775 (4:1 mol/mol)          | 0.14242239 | 0.09087722 |
| Compound 23 citrate                    | 0.13603429 | 0.10647952 |
| bafilomycin A1                         | 0.13326687 | 0.11385917 |
| decitabine:carboplatin (1:1 mol/mol)   | 0.13289719 | 0.1148744  |
| SNS-032                                | 0.1328253  | 0.11507264 |
| doxorubicin:0vitoclax (2:1 mol/mol)    | 0.13254752 | 0.11584117 |
| PF-573228                              | 0.13246968 | 0.11605723 |
| fluvastatin                            | 0.13219944 | 0.11680979 |
| AZD8055                                | 0.13069585 | 0.12106646 |
| LBH-589                                | 0.13063456 | 0.12124248 |
| PL-DI                                  | 0.12729338 | 0.13114128 |
| dabrafenib                             | 0.1265546  | 0.13341151 |
| elocalcitol                            | 0.12644148 | 0.13376176 |
| Compound 7d-cis                        | 0.12599267 | 0.13515831 |
| BRD-K48477130                          | 0.12586046 | 0.13557183 |
| ciclopirox                             | 0.12464655 | 0.13941392 |
| vincristine                            | 0.12182698 | 0.14865741 |
| AZD7762                                | 0.12178605 | 0.14879489 |
| valdecocix                             | 0.12059776 | 0.15282913 |
| omacetaxine mepesucci0te               | 0.11980132 | 0.15557876 |
| doxorubicin                            | 0.11855785 | 0.15994575 |
| SR8278                                 | 0.11816024 | 0.16136129 |

|                                      |            |            |
|--------------------------------------|------------|------------|
| BI-2536                              | 0.11485848 | 0.17347944 |
| apicidin                             | 0.11297326 | 0.18069359 |
| SNX-2112                             | 0.11248498 | 0.1825975  |
| ML239                                | 0.11226449 | 0.18346207 |
| BRD-K09344309                        | 0.1119606  | 0.18465853 |
| KHS101                               | 0.1113789  | 0.18696474 |
| chlorambucil                         | 0.11075053 | 0.18947949 |
| palmostatin B                        | 0.10955874 | 0.19431672 |
| BRD-K03536150                        | 0.1086009  | 0.19826887 |
| KX2-391                              | 0.1067071  | 0.20625338 |
| tacedi0line                          | 0.10623912 | 0.20826153 |
| phloretin                            | 0.1051587  | 0.21295127 |
| nutlin-3                             | 0.10281823 | 0.22336798 |
| StemRegenin 1                        | 0.10256173 | 0.22453111 |
| BRD9647                              | 0.10078998 | 0.2326825  |
| piperlongumine:MST-312 (1:1 mol/mol) | 0.10055576 | 0.23377543 |
| MK-2206                              | 0.09928606 | 0.23976284 |
| manumycin A                          | 0.0971797  | 0.24992986 |
| vorinostat                           | 0.09676713 | 0.25195563 |
| NVP-ADW742                           | 0.09204117 | 0.27596997 |
| nilotinib                            | 0.09120725 | 0.28036256 |
| gossypol                             | 0.0856257  | 0.31096863 |
| SR-II-138A                           | 0.08522452 | 0.31324944 |
| silde0fil                            | 0.08521597 | 0.31329818 |
| axitinib                             | 0.08454882 | 0.31711554 |
| ISOX                                 | 0.08345878 | 0.32341728 |
| JQ-1:carboplatin (1:1 mol/mol)       | 0.08317285 | 0.32508356 |
| alvocidib                            | 0.08279625 | 0.32728665 |
| BMS-754807                           | 0.08257189 | 0.32860371 |
| 968                                  | 0.08182043 | 0.33303969 |
| AT13387                              | 0.0816929  | 0.33379626 |
| BRD-K66532283                        | 0.0813798  | 0.3356585  |
| tosedostat                           | 0.0809921  | 0.33797348 |
| WP1130                               | 0.08044764 | 0.34124167 |
| Ko-143                               | 0.0799458  | 0.34427166 |
| Ki8751                               | 0.0789186  | 0.35052649 |
| NSC95397                             | 0.07505952 | 0.37465646 |
| tivantinib                           | 0.07136387 | 0.39869235 |
| A-804598                             | 0.06991467 | 0.4083629  |
| BRD4132                              | 0.06976433 | 0.40937398 |
| NSC23766                             | 0.06940391 | 0.41180385 |
| barasertib                           | 0.06764152 | 0.42380701 |
| quizartinib                          | 0.06761627 | 0.42398039 |
| BRD-K92856060                        | 0.06620685 | 0.43372588 |
| JQ-1                                 | 0.06595656 | 0.4354698  |
| BRD-A86708339                        | 0.06532989 | 0.43985371 |
| PX-12                                | 0.06437398 | 0.44658887 |
| KU-60019                             | 0.06352037 | 0.45265194 |
| BRD-K01737880                        | 0.06349611 | 0.45282494 |
| cyanoquinoline 11                    | 0.06224707 | 0.46178098 |
| pandacostat                          | 0.0617987  | 0.46501967 |
| LY-2183240                           | 0.0579773  | 0.49312335 |
| SMER-3                               | 0.05701902 | 0.50030931 |
| curcumin                             | 0.05482973 | 0.51693031 |
| KU-55933                             | 0.05117205 | 0.54531717 |
| QS-11                                | 0.04892218 | 0.56315025 |
| bardoxolone methyl                   | 0.04695034 | 0.5790048  |
| GSK-J4                               | 0.04658231 | 0.58198678 |
| austocystin D                        | 0.04566937 | 0.58941431 |
| nelarabine                           | 0.04457704 | 0.59835778 |
| CIL55A                               | 0.04438155 | 0.59996468 |
| BRD-K11533227                        | 0.04275612 | 0.61340026 |

|                                         |            |            |
|-----------------------------------------|------------|------------|
| pifithrin-mu                            | 0.04245373 | 0.61591414 |
| SB-525334                               | 0.04093144 | 0.6286371  |
| ML006                                   | 0.03997718 | 0.63666886 |
| Repligen 136                            | 0.03441438 | 0.68430878 |
| BRD-A71883111                           | 0.03279179 | 0.69845288 |
| LE-135                                  | 0.03187779 | 0.70646647 |
| KW-2449                                 | 0.0310021  | 0.71417446 |
| BRD-K16147474                           | 0.02953614 | 0.72714262 |
| zebularine                              | 0.02875977 | 0.73404224 |
| GSK461364                               | 0.02800643 | 0.74075763 |
| dacarbazine                             | 0.0277609  | 0.74295052 |
| AM-580                                  | 0.02766495 | 0.74380801 |
| mitomycin                               | 0.02636605 | 0.75544724 |
| avrainvillamide                         | 0.02509684 | 0.76687368 |
| sotrastaurin                            | 0.02235203 | 0.79175377 |
| selumetinib:decitabine (4:1 mol/mol)    | 0.02225535 | 0.79263413 |
| regorafenib                             | 0.02196814 | 0.79525097 |
| CHIR-99021                              | 0.02004675 | 0.81281435 |
| lomeguatrib                             | 0.01929101 | 0.8197486  |
| YM-155                                  | 0.01806885 | 0.83099195 |
| tacrolimus                              | 0.01690528 | 0.84172825 |
| methylnstat                             | 0.01637653 | 0.84661673 |
| belinostat                              | 0.0162948  | 0.84737289 |
| 0kiterpiosin                            | 0.01596379 | 0.85043677 |
| isonicotinohydroxamic acid              | 0.01577008 | 0.85223087 |
| NSC48300                                | 0.01466719 | 0.86245944 |
| ABT-199                                 | 0.014602   | 0.86306477 |
| carboplatin:etoposide (40:17 mol/mol)   | 0.01259835 | 0.88170696 |
| KU 0060648                              | 0.0124175  | 0.88339297 |
| BRD-K52037352                           | 0.01231165 | 0.88438009 |
| KU-0063794                              | 0.01149989 | 0.8919555  |
| BRD-K51490254                           | 0.01097789 | 0.89683205 |
| HLI 373                                 | 0.01027181 | 0.90343436 |
| serdemetan:SCH-529074 (1:1 mol/mol)     | 0.00921457 | 0.91333254 |
| TG-100-115                              | 0.00827598 | 0.92213103 |
| leptomycin B                            | 0.00703494 | 0.93377917 |
| PAC-1                                   | 0.00590123 | 0.94443219 |
| SU11274                                 | 0.00512891 | 0.95169515 |
| oligomycin A                            | 0.00466304 | 0.95607815 |
| tanespimycin:bortezomib (250:1 mol/mol) | 0.00285274 | 0.97312122 |
| brefeldin A                             | 0.00220673 | 0.97920645 |
| YL54                                    | 0.00165159 | 0.98443666 |
| GANT-61                                 | 0.00132653 | 0.98749949 |
| SB-743921                               | 0.00096207 | 0.99093377 |
| tamoxifen                               | 0.00072043 | 0.99321084 |
| BRD-K90370028                           | 0.00056252 | 0.99469894 |
| BRD-K33514849                           | -0.000507  | 0.99522211 |
| BRD-K63431240                           | -0.0006913 | 0.9934855  |
| ML311                                   | -0.0023089 | 0.97824437 |
| trametinib                              | -0.0026215 | 0.97529945 |
| teniposide                              | -0.0051941 | 0.95108152 |
| BRD1835                                 | -0.0054333 | 0.94883214 |
| paclitaxel                              | -0.0063039 | 0.94064705 |
| WZ4002                                  | -0.0069766 | 0.93432697 |
| di0ciclib                               | -0.0082402 | 0.9224666  |
| BRD-K34099515                           | -0.0093831 | 0.91175359 |
| ceranib-2                               | -0.0105803 | 0.90054885 |
| simvastatin                             | -0.0124691 | 0.88291237 |
| masitinib                               | -0.0130816 | 0.8772046  |
| SN-38                                   | -0.014172  | 0.86705944 |
| BRD6340                                 | -0.0141898 | 0.86689409 |
| UNC0638                                 | -0.0145507 | 0.86354089 |



|                                         |            |            |
|-----------------------------------------|------------|------------|
| PF-184                                  | -0.0149878 | 0.85948345 |
| KPT185                                  | -0.0152132 | 0.85739252 |
| CHM-1                                   | -0.0156611 | 0.85324031 |
| BRD-M00053801                           | -0.0157206 | 0.8526891  |
| YK 4-279                                | -0.0160691 | 0.84946143 |
| selumetinib:BRD-A02303741 (4:1 mol/mol) | -0.018012  | 0.83151621 |
| piperlongumine                          | -0.018292  | 0.82893645 |
| OSI-027                                 | -0.0183123 | 0.82874993 |
| BRD-K27188169:0vitoclax (2:1 mol/mol)   | -0.0186377 | 0.8257546  |
| SZ4TA2                                  | -0.0187323 | 0.82488428 |
| CIL41                                   | -0.0206839 | 0.80697931 |
| rigosertib                              | -0.0230155 | 0.7857193  |
| IC-87114                                | -0.0241818 | 0.77514268 |
| trifluoperazine                         | -0.0246721 | 0.7707089  |
| BRD-K55116708                           | -0.0267002 | 0.75244761 |
| epigallocatechin-3-monogallate          | -0.0268308 | 0.75127663 |
| crizotinib                              | -0.0286037 | 0.73543214 |
| ML320                                   | -0.0287085 | 0.73449832 |
| BRD-K50799972                           | -0.0305026 | 0.71858457 |
| BRD-K61166597                           | -0.030584  | 0.71786485 |
| B02                                     | -0.0309912 | 0.7142704  |
| GSK525762A                              | -0.0314802 | 0.70996289 |
| ML050                                   | -0.0322102 | 0.70354846 |
| salermide                               | -0.0324778 | 0.7012021  |
| CID-5951923                             | -0.0340097 | 0.68782644 |
| SCH-79797                               | -0.0349706 | 0.67948493 |
| triazolothiadiazine                     | -0.0356906 | 0.67325991 |
| SB-225002                               | -0.0376047 | 0.65681991 |
| decitabine:0vitoclax (2:1 mol/mol)      | -0.0379815 | 0.65360229 |
| CIL56                                   | -0.0386    | 0.64833491 |
| neopeltolide                            | -0.0395913 | 0.63992884 |
| BRD-K34222889                           | -0.0407443 | 0.63020896 |
| selumetinib:MK-2206 (8:1 mol/mol)       | -0.0418321 | 0.62109629 |
| isoliquiritigenin                       | -0.0420537 | 0.61924689 |
| alisertib                               | -0.0434951 | 0.60727553 |
| RG-108                                  | -0.044108  | 0.60221689 |
| SCH-529074                              | -0.045223  | 0.59306123 |
| ifosfamide                              | -0.0472534 | 0.57655461 |
| erlotinib                               | -0.0484128 | 0.56722582 |
| temozolomide                            | -0.0490243 | 0.56233514 |
| BRD-K30748066                           | -0.0499777 | 0.55474954 |
| NSC 74859                               | -0.0505705 | 0.55005777 |
| staurosporine                           | -0.0508275 | 0.54803001 |
| selumetinib:JQ-1 (4:1 mol/mol)          | -0.0534468 | 0.52757361 |
| entinostat                              | -0.0534964 | 0.52719012 |
| dexamethasone                           | -0.0537123 | 0.52552165 |
| tipifarnib-P1                           | -0.0548136 | 0.51705384 |
| ibrutinib                               | -0.0577306 | 0.49496835 |
| momelotinib                             | -0.0600771 | 0.47757078 |
| ML031                                   | -0.061143  | 0.46977829 |
| BMS-195614                              | -0.0616831 | 0.46585673 |
| BMS-270394                              | -0.0625003 | 0.45995756 |
| BRD-K29313308                           | -0.0629212 | 0.4569349  |
| blebbistatin                            | -0.0639338 | 0.44970963 |
| BRD-A94377914                           | -0.0642041 | 0.44779167 |
| cyclophosphamide                        | -0.0648014 | 0.4435703  |
| QW-BI-011                               | -0.0649606 | 0.44244861 |
| selumetinib:vorinostat (8:1 mol/mol)    | -0.0658166 | 0.43644701 |
| necrostatin-1                           | -0.0669326 | 0.42869198 |
| ML162                                   | -0.0670551 | 0.42784563 |
| selumetinib:PLX-4032 (8:1 mol/mol)      | -0.0671367 | 0.42728176 |
| AT7867                                  | -0.0682481 | 0.41965316 |

|                                       |            |            |
|---------------------------------------|------------|------------|
| AZD6482                               | -0.0718825 | 0.39526481 |
| fingolimod                            | -0.0739359 | 0.38186902 |
| GW-405833                             | -0.075378  | 0.37262731 |
| PLX-4720                              | -0.0760991 | 0.36805854 |
| MST-312                               | -0.0807385 | 0.33949347 |
| pluripotin                            | -0.0808665 | 0.33872593 |
| vorinostat:0vitoclax (4:1 mol/mol)    | -0.0818643 | 0.33277978 |
| COL-3                                 | -0.0827266 | 0.32769521 |
| selumetinib                           | -0.0835529 | 0.32286972 |
| BRD-K17060750                         | -0.0840612 | 0.3199249  |
| CD-437                                | -0.0850435 | 0.31428239 |
| bleomycin A2                          | -0.0858355 | 0.30978041 |
| CBB-1007                              | -0.0872937 | 0.30160198 |
| prochlorperazine                      | -0.0877169 | 0.29925562 |
| AZD4547                               | -0.0886583 | 0.29407921 |
| itraco0zole                           | -0.0900409 | 0.28658482 |
| DBeQ                                  | -0.0921594 | 0.27535081 |
| etoposide                             | -0.0929935 | 0.27101057 |
| TPCA-1                                | -0.0935972 | 0.26789823 |
| BRD-A02303741:0vitoclax (2:1 mol/mol) | -0.0938066 | 0.2668244  |
| neuro01 differentiation inducer III   | -0.095463  | 0.25843348 |
| LRRK2-IN-1                            | -0.0965933 | 0.25281237 |
| BRD-K41597374                         | -0.0975005 | 0.2483625  |
| BRD-K66453893                         | -0.0978987 | 0.24642626 |
| isoevodiamine                         | -0.0993667 | 0.2393793  |
| ETP-46464                             | -0.1003494 | 0.23474148 |
| Mdivi-1                               | -0.1023269 | 0.22559959 |
| JQ-1:vorinostat (2:1 mol/mol)         | -0.103019  | 0.22246073 |
| AT-406                                | -0.1055288 | 0.21133633 |
| BRD-K55473186                         | -0.1057415 | 0.21041237 |
| tigecycline                           | -0.108196  | 0.19995706 |
| lenvatinib                            | -0.1107619 | 0.18943367 |
| dari0parsin                           | -0.1146345 | 0.17432517 |
| PF-543                                | -0.1154804 | 0.17114681 |
| 0vitoclax:sorafenib (1:1 mol/mol)     | -0.1162615 | 0.16825028 |
| NVP-BEZ235                            | -0.1192053 | 0.15766067 |
| AA-COCF3                              | -0.1201505 | 0.15436882 |
| tretinoin:carboplatin (2:1 mol/mol)   | -0.1204696 | 0.15326912 |
| sunitinib                             | -0.1208173 | 0.15207771 |
| abiraterone                           | -0.1212347 | 0.15065677 |
| BRD-K75293299                         | -0.1248844 | 0.13865465 |
| PF-750                                | -0.1252806 | 0.13739695 |
| fulvestrant                           | -0.1257656 | 0.13586904 |
| PLX-4032                              | -0.126413  | 0.1338501  |
| GW-843682X                            | -0.1267189 | 0.13290412 |
| GSK-3 inhibitor IX                    | -0.1284759 | 0.12756948 |
| AC55649                               | -0.1294708 | 0.12462257 |
| cimetidine                            | -0.1308931 | 0.12050123 |
| WZ8040                                | -0.1310793 | 0.11996977 |
| temsirolimus                          | -0.1315963 | 0.11850317 |
| JQ-1:MK-0752 (1:1 mol/mol)            | -0.1318584 | 0.11776506 |
| BRD-K35604418                         | -0.1327053 | 0.11540409 |
| ML210                                 | -0.1342956 | 0.11107084 |
| carboplatin:UNC0638 (2:1 mol/mol)     | -0.1352306 | 0.10858286 |
| semagacestat                          | -0.1353183 | 0.10835182 |
| BRD8958                               | -0.1359399 | 0.10672496 |
| PD318088                              | -0.1364404 | 0.10542882 |
| XL765                                 | -0.138019  | 0.10142208 |
| SKI-II                                | -0.1380344 | 0.10138344 |
| obatoclax                             | -0.1383539 | 0.10058769 |
| 0vitoclax:MST-312 (1:1 mol/mol)       | -0.1392842 | 0.098298   |
| PD 153035                             | -0.1406998 | 0.09489332 |

|                                        |            |            |
|----------------------------------------|------------|------------|
| ruxolitinib                            | -0.1457128 | 0.08358226 |
| GSK1059615                             | -0.1460605 | 0.08283957 |
| tipifarnib-P2                          | -0.1461599 | 0.08262827 |
| tamatinib                              | -0.148427  | 0.07792458 |
| BRD-K51831558                          | -0.1491425 | 0.07648581 |
| CCT036477                              | -0.1509297 | 0.07298515 |
| ABT-737                                | -0.1520238 | 0.07090692 |
| Bax channel blocker                    | -0.1521721 | 0.07062887 |
| 1S,3R-RSL-3                            | -0.1526143 | 0.06980537 |
| neratinib                              | -0.1535044 | 0.06817122 |
| VX-680                                 | -0.154533  | 0.06632157 |
| serdemetan                             | -0.1551257 | 0.06527472 |
| selumetinib:0vitoclax (8:1 mol/mol)    | -0.1557439 | 0.06419692 |
| indisulam                              | -0.1559211 | 0.06389067 |
| afatinib                               | -0.1579957 | 0.06039379 |
| lovastatin                             | -0.1587283 | 0.05919697 |
| dasatinib                              | -0.1594255 | 0.05807615 |
| sirolimus:bortezomib (250:1 mol/mol)   | -0.1600461 | 0.0570933  |
| tandutinib                             | -0.1606385 | 0.05616796 |
| canertinib                             | -0.1630077 | 0.05258954 |
| silmitasertib                          | -0.1634303 | 0.0519715  |
| myriocin                               | -0.165053  | 0.04965385 |
| parthenolide                           | -0.1669542 | 0.04704832 |
| CD-1530                                | -0.1671609 | 0.04677194 |
| MGCD-265                               | -0.168437  | 0.04509599 |
| BRD-K94991378                          | -0.1698042 | 0.04335622 |
| BRD-A02303741                          | -0.1717135 | 0.04102077 |
| SID 26681509                           | -0.1720321 | 0.04064155 |
| erastin                                | -0.1726362 | 0.03993055 |
| BIX-01294                              | -0.172753  | 0.03979425 |
| vorinostat:carboplatin (1:1 mol/mol)   | -0.1735768 | 0.03884431 |
| oxaliplatin                            | -0.1741588 | 0.03818467 |
| PIK-93                                 | -0.1772825 | 0.03480321 |
| docetaxel                              | -0.1792974 | 0.03275913 |
| selumetinib:tretinoin (2:1 mol/mol)    | -0.1811167 | 0.03100173 |
| BRD-K26531177                          | -0.1839477 | 0.02842646 |
| MLN2480                                | -0.1850567 | 0.02746854 |
| UNC0638:0vitoclax (1:1 mol/mol)        | -0.1907527 | 0.02297136 |
| alisertib:0vitoclax (2:1 mol/mol)      | -0.1908471 | 0.0229025  |
| GDC-0941                               | -0.1913562 | 0.02253417 |
| NVP-TAE684                             | -0.1916262 | 0.02234096 |
| tretinoin:0vitoclax (4:1 mol/mol)      | -0.1942112 | 0.02056185 |
| 0vitoclax                              | -0.1956689 | 0.01961355 |
| cerulenin                              | -0.1969645 | 0.01880263 |
| selumetinib:UNC0638 (4:1 mol/mol)      | -0.2015812 | 0.01614439 |
| 0vitoclax:piperlongumine (1:1 mol/mol) | -0.2054554 | 0.01417211 |
| R428                                   | -0.2060051 | 0.01391005 |
| biri0pant                              | -0.2062935 | 0.01377428 |
| BRD-K02492147                          | -0.2071732 | 0.01336718 |
| AZD1480                                | -0.2097512 | 0.01223418 |
| lapatinib                              | -0.2111103 | 0.01167149 |
| PRIMA-1                                | -0.211619  | 0.01146678 |
| SRT-1720                               | -0.2117352 | 0.01142045 |
| carboplatin                            | -0.2139892 | 0.01055399 |
| JQ-1:0vitoclax (2:1 mol/mol)           | -0.2147255 | 0.01028376 |
| cytochalasin B                         | -0.2151807 | 0.01011976 |
| avicin D                               | -0.2167103 | 0.00958545 |
| PDMP                                   | -0.2192392 | 0.00875649 |
| tretinoin                              | -0.2199332 | 0.0085404  |
| ELCPK                                  | -0.2208147 | 0.0082727  |
| 0vitoclax:pluripotin (1:1 mol/mol)     | -0.2208264 | 0.00826919 |
| BIBR-1532                              | -0.220861  | 0.00825884 |

|                                    |            |            |
|------------------------------------|------------|------------|
| RAF265                             | -0.2217823 | 0.00798743 |
| thalidomide                        | -0.2225137 | 0.00777761 |
| JW-480                             | -0.2233395 | 0.00754662 |
| BRD-K33199242                      | -0.2237119 | 0.00744445 |
| BRD-K13999467                      | -0.223744  | 0.00743569 |
| purmorphamine                      | -0.2257206 | 0.00691424 |
| tubastatin A                       | -0.2286703 | 0.00619642 |
| ML258                              | -0.2290974 | 0.0060982  |
| nintedanib                         | -0.230084  | 0.00587655 |
| cucurbitacin I                     | -0.2303723 | 0.00581315 |
| PRIMA-1-Met                        | -0.2320343 | 0.00545943 |
| olaparib                           | -0.2322807 | 0.00540866 |
| Compound 1541A                     | -0.2375362 | 0.00442154 |
| Ovitoclax:PLX-4032 (1:1 mol/mol)   | -0.2381821 | 0.00431211 |
| PYR-41                             | -0.2382122 | 0.00430707 |
| JQ-1:UNC0638 (2:1 mol/mol)         | -0.2401183 | 0.00399847 |
| NVP-BSK805                         | -0.2410741 | 0.00385133 |
| foretinib                          | -0.2425775 | 0.00362971 |
| N9-isopropylolomoucine             | -0.2453409 | 0.00325208 |
| TGX-221                            | -0.2455484 | 0.00322521 |
| selumetinib:GDC-0941 (4:1 mol/mol) | -0.2457638 | 0.00319752 |
| BRD-K28456706                      | -0.2478926 | 0.00293522 |
| BRD-K48334597                      | -0.2487819 | 0.00283152 |
| HC-067047                          | -0.2494724 | 0.0027533  |
| TG-101348                          | -0.2501735 | 0.00267587 |
| PI-103                             | -0.2505628 | 0.00263373 |
| BCL-LZH-4                          | -0.2534249 | 0.00234193 |
| BRD-K24690302                      | -0.2545168 | 0.00223855 |
| CAL-101                            | -0.2572557 | 0.00199719 |
| CAY10594                           | -0.2590653 | 0.00185095 |
| PRL-3 inhibitor I                  | -0.2659281 | 0.00138055 |
| MG-132                             | -0.2709818 | 0.00110695 |
| cabozantinib                       | -0.2743739 | 0.00095217 |
| sirolimus                          | -0.2764269 | 0.00086839 |
| MK-1775                            | -0.2773121 | 0.0008344  |
| NSC632839                          | -0.2799808 | 0.00073918 |
| BRD-K09587429                      | -0.2813013 | 0.00069585 |
| Ch-55                              | -0.2822243 | 0.00066697 |
| BRD1812                            | -0.2825562 | 0.00065685 |
| BRD-K27986637                      | -0.2845158 | 0.00059996 |
| SB-431542                          | -0.2904923 | 0.00045326 |
| ZSTK474                            | -0.2911597 | 0.00043912 |
| BRD-K96970199                      | -0.2914566 | 0.00043297 |
| BRD-K42260513                      | -0.2950354 | 0.00036475 |
| gefitinib                          | -0.3036813 | 0.00023883 |
| BRD-K86535717                      | -0.3059544 | 0.0002132  |
| ML334 diastereomer                 | -0.3066236 | 0.00020615 |
| FSC231                             | -0.3068103 | 0.00020423 |
| BRD-K85133207                      | -0.3101459 | 0.00017251 |
| pifithrin-alpha                    | -0.3111945 | 0.00016353 |
| veliparib                          | -0.3129616 | 0.00014937 |
| WAY-362450                         | -0.3133415 | 0.00014648 |
| BYL-719                            | -0.3156147 | 0.00013024 |
| BRD-K80183349                      | -0.3196672 | 0.00010538 |
| LY-2157299                         | -0.3232028 | 8.74E-05   |
| 16-beta-bromoandrosterone          | -0.323766  | 8.48E-05   |
| istradefylline                     | -0.3272629 | 7.03E-05   |
| GSK2636771                         | -0.3273628 | 6.99E-05   |
| Ovitoclax:biri0pant (1:1 mol/mol)  | -0.3279688 | 6.76E-05   |
| cediranib                          | -0.3282061 | 6.68E-05   |
| MK-0752                            | -0.3307135 | 5.83E-05   |
| BRD-A05715709                      | -0.3327406 | 5.21E-05   |

|                                   |            |          |
|-----------------------------------|------------|----------|
| JW-74                             | -0.334839  | 4.64E-05 |
| BIRB-796                          | -0.3357639 | 4.41E-05 |
| sitagliptin                       | -0.3485478 | 2.13E-05 |
| MI-1                              | -0.3485911 | 2.12E-05 |
| triptolide                        | -0.3489987 | 2.07E-05 |
| BRD-K19103580                     | -0.3508084 | 1.87E-05 |
| C6-ceramide                       | -0.3519096 | 1.75E-05 |
| SGX-523                           | -0.3530387 | 1.64E-05 |
| salermide:PLX-4032 (12:1 mol/mol) | -0.3626261 | 9.21E-06 |
| crizotinib:PLX-4032 (2:1 mol/mol) | -0.3628368 | 9.09E-06 |
| BRD-K04800985                     | -0.3635448 | 8.71E-06 |
| NPC-26                            | -0.3640318 | 8.45E-06 |
| BRD-K27188169                     | -0.3665333 | 7.25E-06 |
| ML083                             | -0.3682388 | 6.52E-06 |
| saracatinib                       | -0.3717155 | 5.25E-06 |
| L-685458                          | -0.3787289 | 3.36E-06 |
| erlotinib:PLX-4032 (2:1 mol/mol)  | -0.3832858 | 2.50E-06 |
| JW-55                             | -0.3842399 | 2.35E-06 |
| vandetanib                        | -0.3865323 | 2.02E-06 |
| CIL55                             | -0.3882005 | 1.81E-06 |
| BRD8899                           | -0.3889544 | 1.72E-06 |
| BRD-K37390332                     | -0.3956243 | 1.10E-06 |
| BRD-K44224150                     | -0.3979656 | 9.37E-07 |
| SR1001                            | -0.3981784 | 9.23E-07 |
| compound 1B                       | -0.4029139 | 6.65E-07 |
| BRD-K99006945                     | -0.4055665 | 5.53E-07 |
| O-6-benzylguanine                 | -0.405635  | 5.50E-07 |
| importazole                       | -0.4073877 | 4.86E-07 |
| BRD-K45681478                     | -0.4185326 | 2.18E-07 |
| BRD-K20514654                     | -0.4214896 | 1.75E-07 |
| BEC                               | -0.4252636 | 1.32E-07 |
| IU1                               | -0.4264365 | 1.21E-07 |
| BRD-K96431673                     | -0.4291322 | 9.90E-08 |
| fumonisin B1                      | -0.434466  | 6.58E-08 |
| vorapaxar                         | -0.4351299 | 6.25E-08 |
| BRD-K41334119                     | -0.4378822 | 5.05E-08 |
| GSK4112                           | -0.4525721 | 1.56E-08 |
| ciclosporin                       | -0.4553575 | 1.24E-08 |
| BRD-K78574327                     | -0.4556075 | 1.22E-08 |
| UNC0321                           | -0.4672777 | 4.56E-09 |
| NSC30930                          | -0.4727798 | 2.83E-09 |
| PF-4800567 hydrochloride          | -0.4796229 | 1.55E-09 |
| BRD-K02251932                     | -0.4842575 | 1.02E-09 |
| IPR-456                           | -0.4893739 | 6.41E-10 |
| BRD-K30019337                     | -0.4939581 | 4.19E-10 |
| BRD-K49290616                     | -0.497229  | 3.08E-10 |
| ML312                             | -0.4985835 | 2.71E-10 |
| BRD-K84807411                     | -0.5011423 | 2.12E-10 |
| BRD-K03911514                     | -0.503132  | 1.76E-10 |
| BRD-K34485477                     | -0.50645   | 1.27E-10 |
| VU0155056                         | -0.5125204 | 7.02E-11 |
| FGIN-1-27                         | -0.5142558 | 5.91E-11 |
| BRD-K14844214                     | -0.5230701 | 2.42E-11 |
| BRD-K27224038                     | -0.560277  | 4.17E-13 |
| BRD-K71781559                     | -0.6972612 | 5.48E-22 |

---
